# Supplementary material for: Enhanced osteopontin splicing regulated by RUNX2 is HDAC-dependent and induces invasive phenotypes in NSCLC cells
Source: PubMed Central journal article supplement (PMC6873507; doi:10.1186/s12935-019-1033-5), 2019-11-21

Figure S1

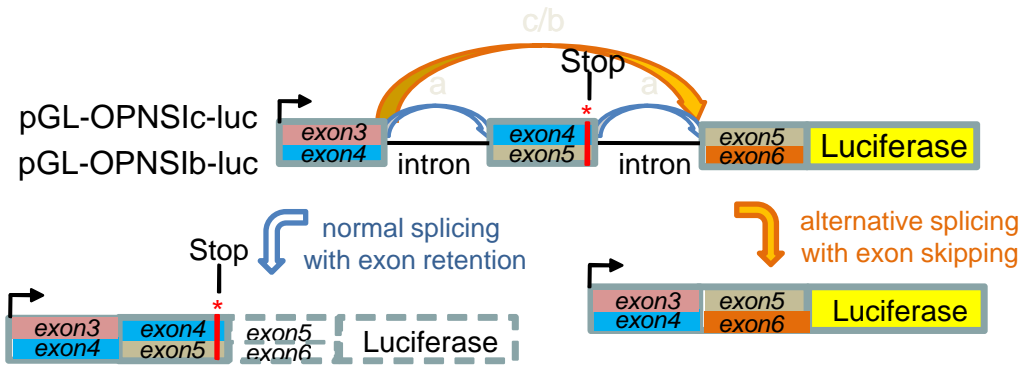

Figure S2

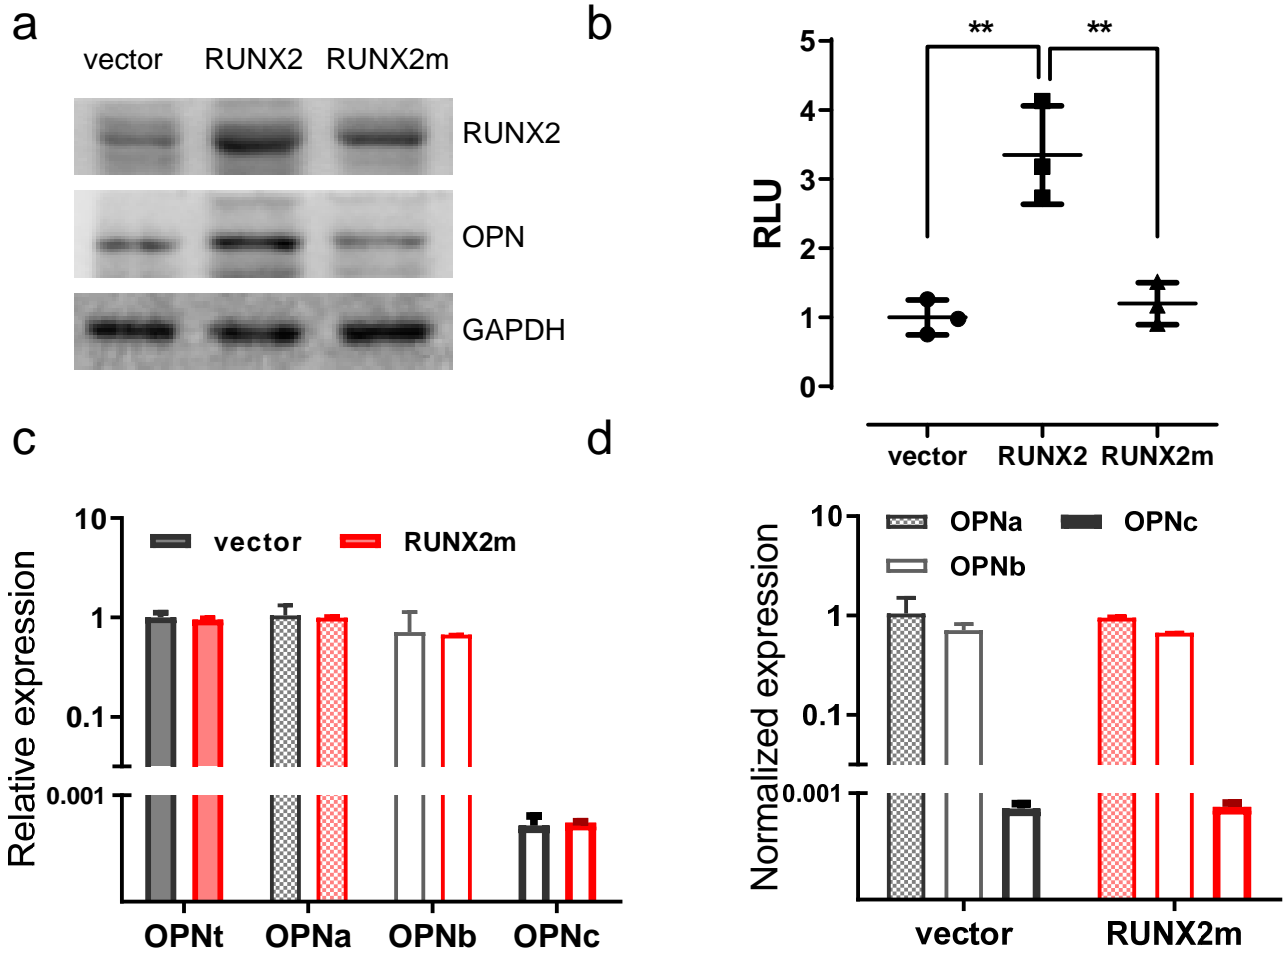

Figure S3

a

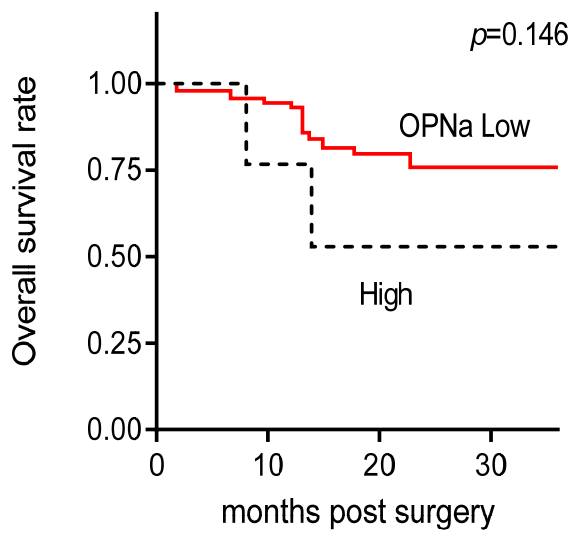

b

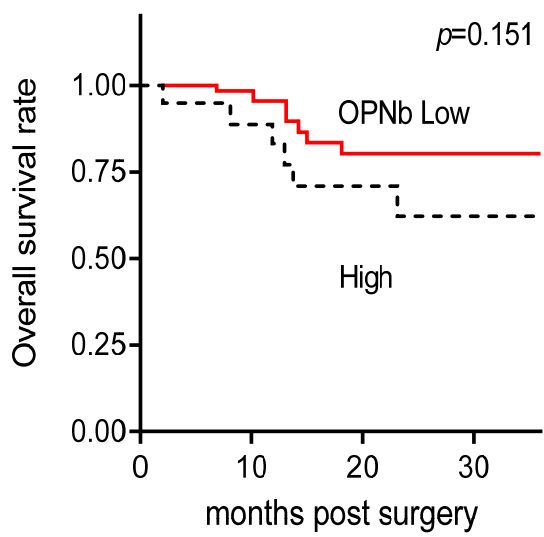

# Figure S4

a

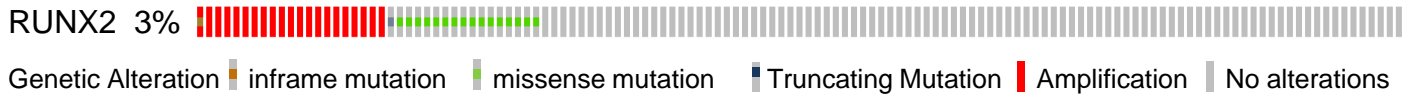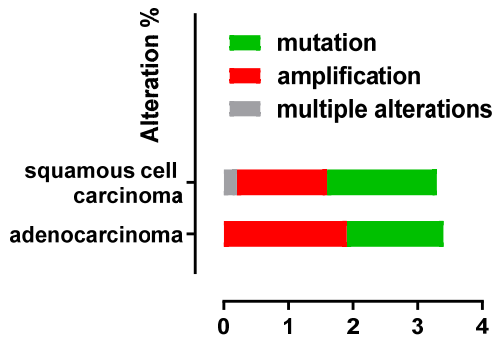

b

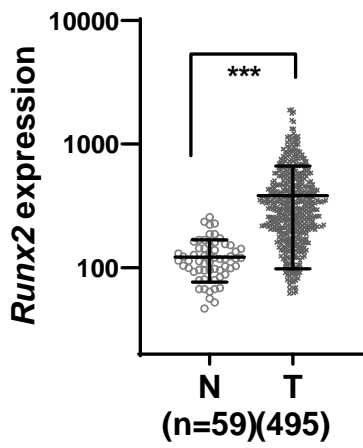

Supplement: 12935_2019_1033_MOESM1_ESM.pdf [file 12935_2019_1033_MOESM1_ESM.pdf]
